# Supplementary material for: Design, Synthesis and Biological Evaluation of Jahanyne Analogs as Cell Cycle Arrest Inducers
Source: PubMed Central journal article supplement (PMC7142928; doi:10.3390/md18030176), 2020-03-23
Supplement: marinedrugs-18-00176-s001.pdf [file marinedrugs-18-00176-s001.pdf]

# Design, Synthesis and Biological Evaluation of Jahanyne Analogues as Cell Cycle Arrest Inducers

Baijun Ye <sup>1</sup>, Jianmiao Gong <sup>2</sup>, Qiuying Li <sup>2</sup>, Shiqi Bao <sup>2</sup>, Xuemei Zhang <sup>2</sup>, Jing Chen <sup>2</sup>, Qing Meng <sup>1</sup>, Bolin Chen<sup>1</sup>, Peng Jiang <sup>1</sup>, Liang Wang <sup>1,\*</sup> and Yue Chen<sup>1,3,\*</sup>

<sup>1</sup> The State Key Laboratory of Medicinal Chemical Biology, College of Pharmacy and Tianjin Key Laboratory of Molecular Drug Research, Nankai University, Tianjin 300350, PR China; yebaijunts@126.com (B.Y.); mengqing19920220@163.com (Q.M.); 2120150647@mail.nankai.edu.cn (B.C.); jiang1921372889@126.com (P.J.);

<sup>2</sup> Accendatech Co., Ltd., Tianjin 300384, PR China; jianmiao.gong@accendatech.com (J.G.); liqiuying@mail.nankai.edu.cn (Q.L.); shiqi.bao@accendatech.com (S.B.); xuemei.zhang@accendatech.com (X.Z.); chenjing@accendatech.com (J.C.);

<sup>3</sup> Collaborative Innovation Center of Chemical Science and Engineering, Tianjin 300350, PR China;

\* Correspondence: lwang@nankai.edu.cn (L.W.); yuechen@nankai.edu.cn (Y.C.); Tel.: +86-22-85358387

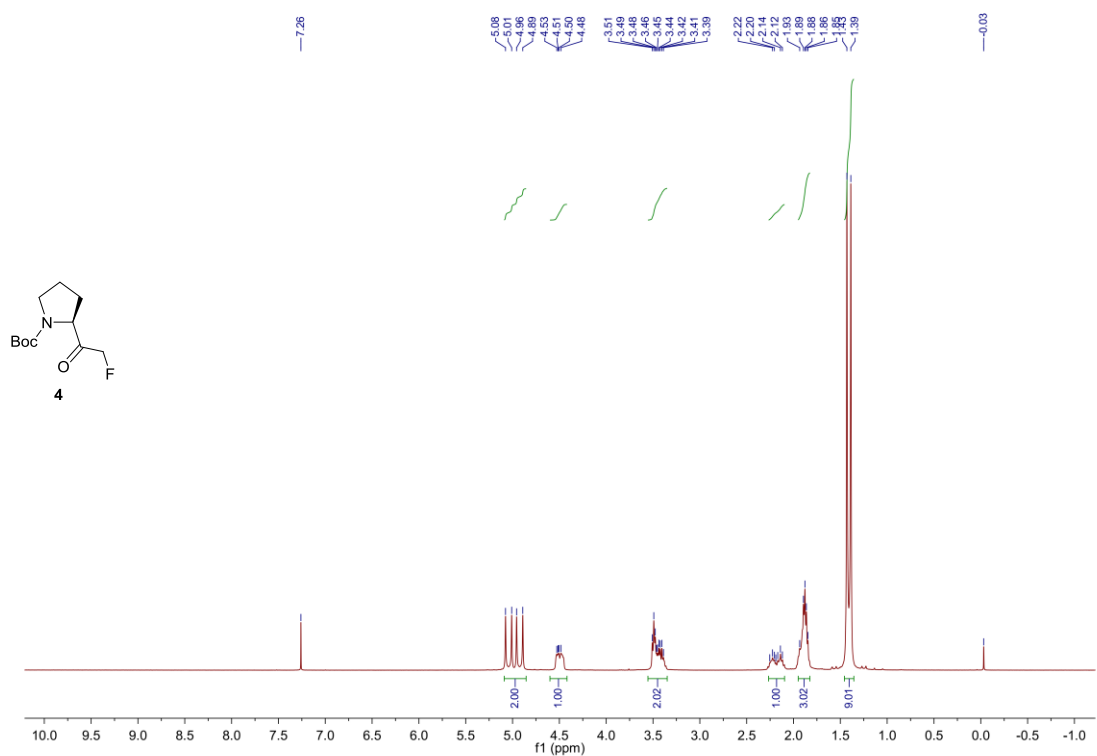

Figure S1. <sup>1</sup>H NMR (400 MHz, CDCl<sub>3</sub>) spectrum of compound 4.

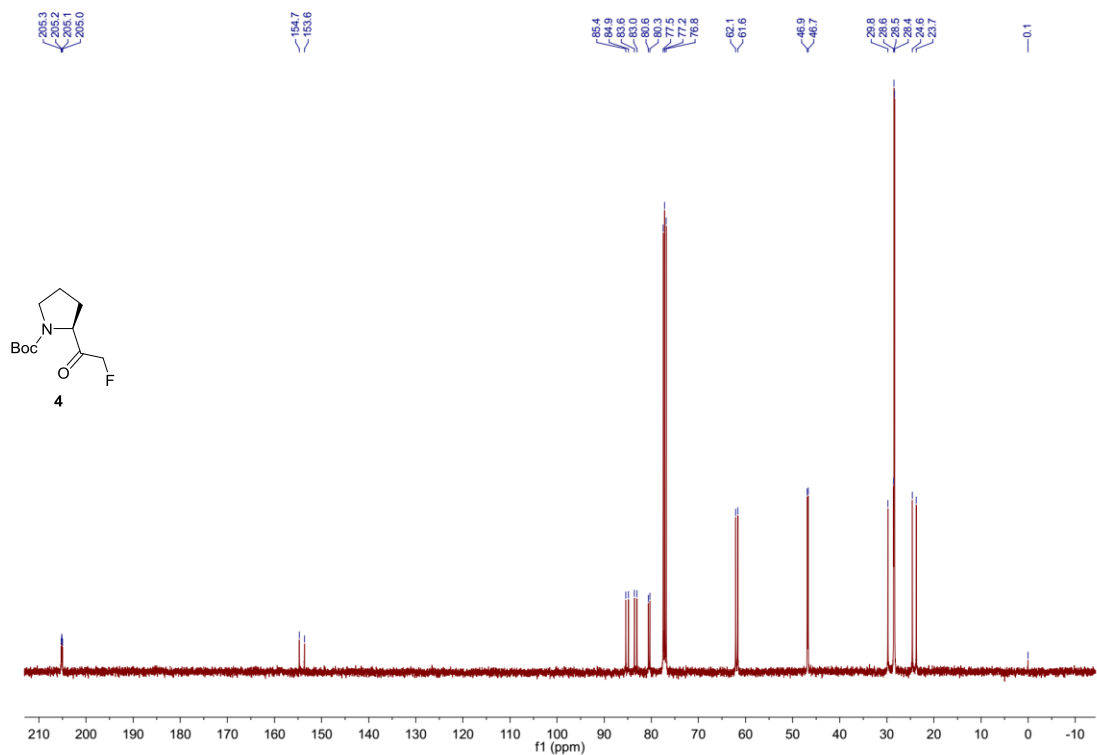

Figure S2. <sup>13</sup>C NMR (100 MHz, CDCl<sub>3</sub>) spectrum of compound 4.

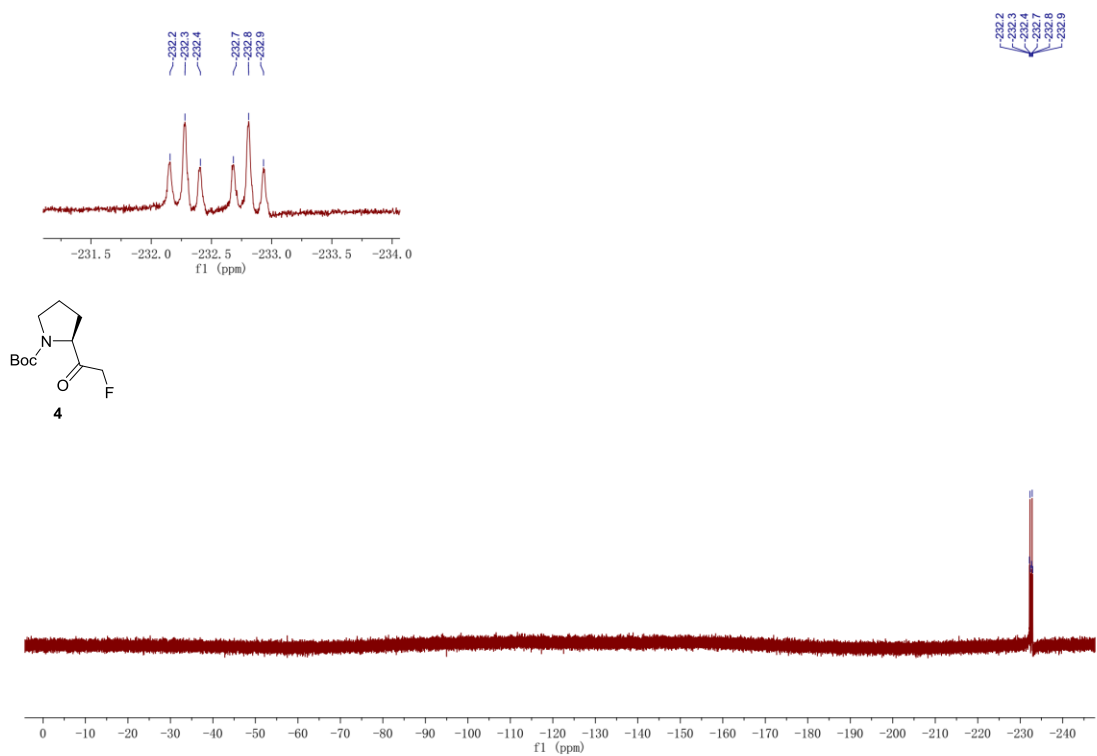

Figure S3. <sup>19</sup>F NMR (400 MHz, CDCl<sub>3</sub>) spectrum of compound 4.

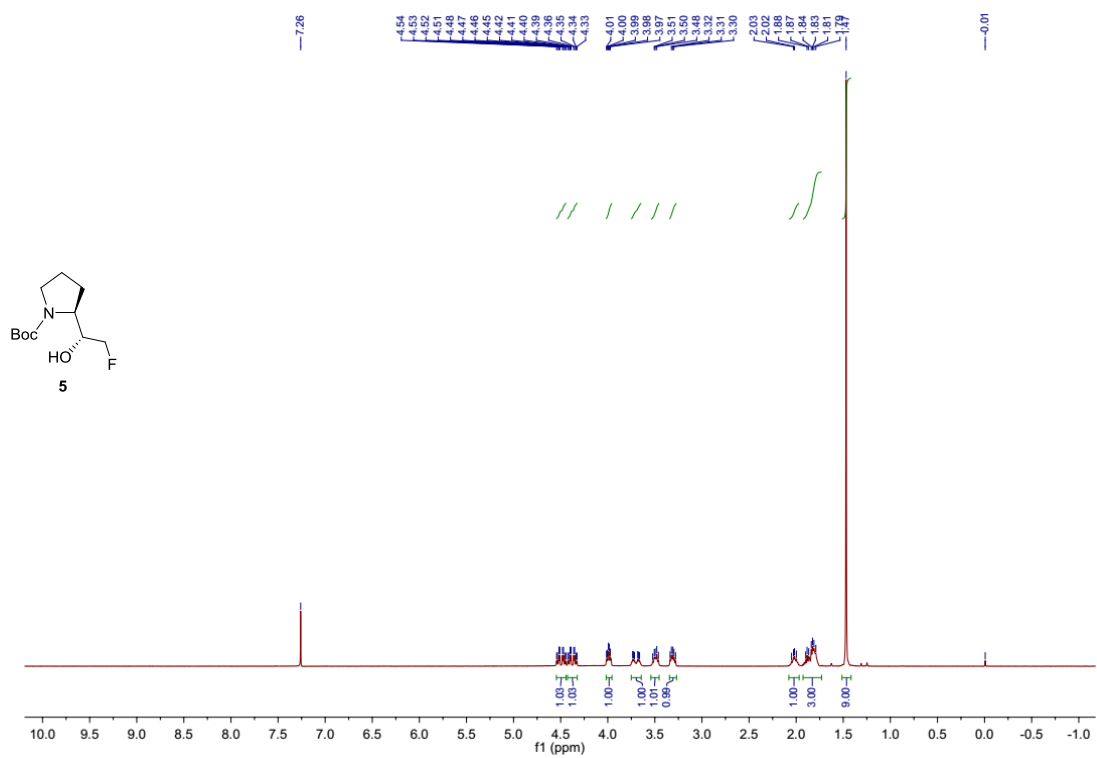

Figure S4. <sup>1</sup>H NMR (400 MHz, CDCl<sub>3</sub>) spectrum of compound 5.

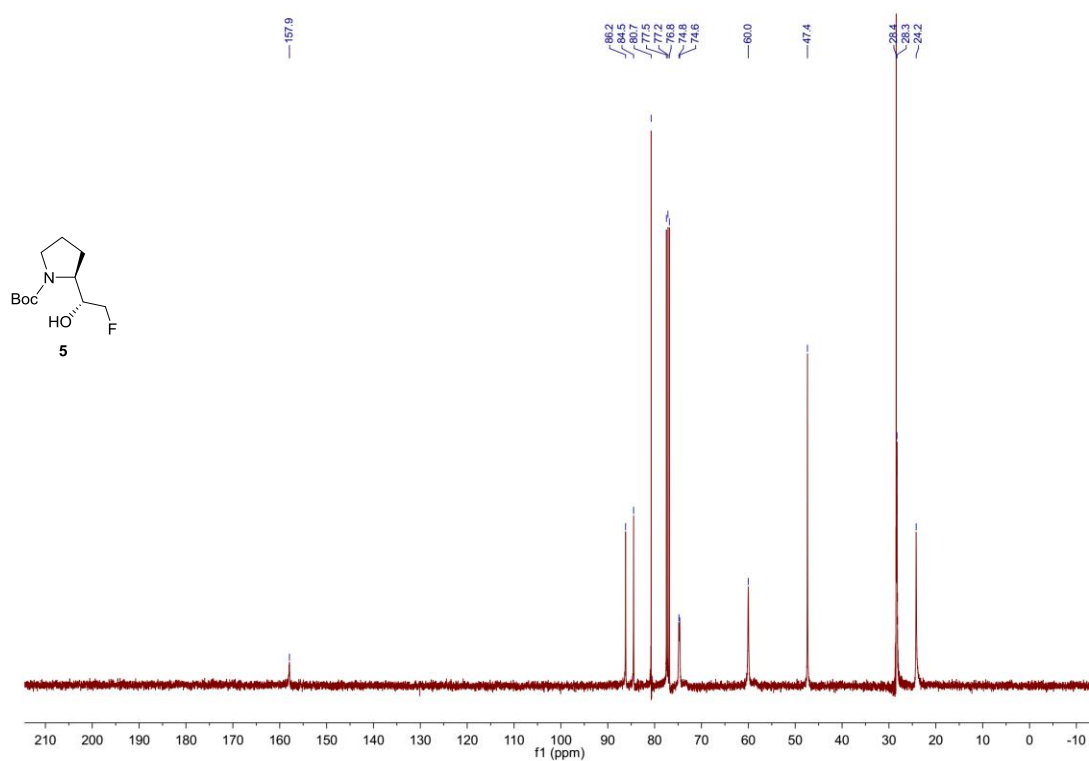

Figure S5. <sup>13</sup>C NMR (100 MHz, CDCl<sub>3</sub>) spectrum of compound 5.

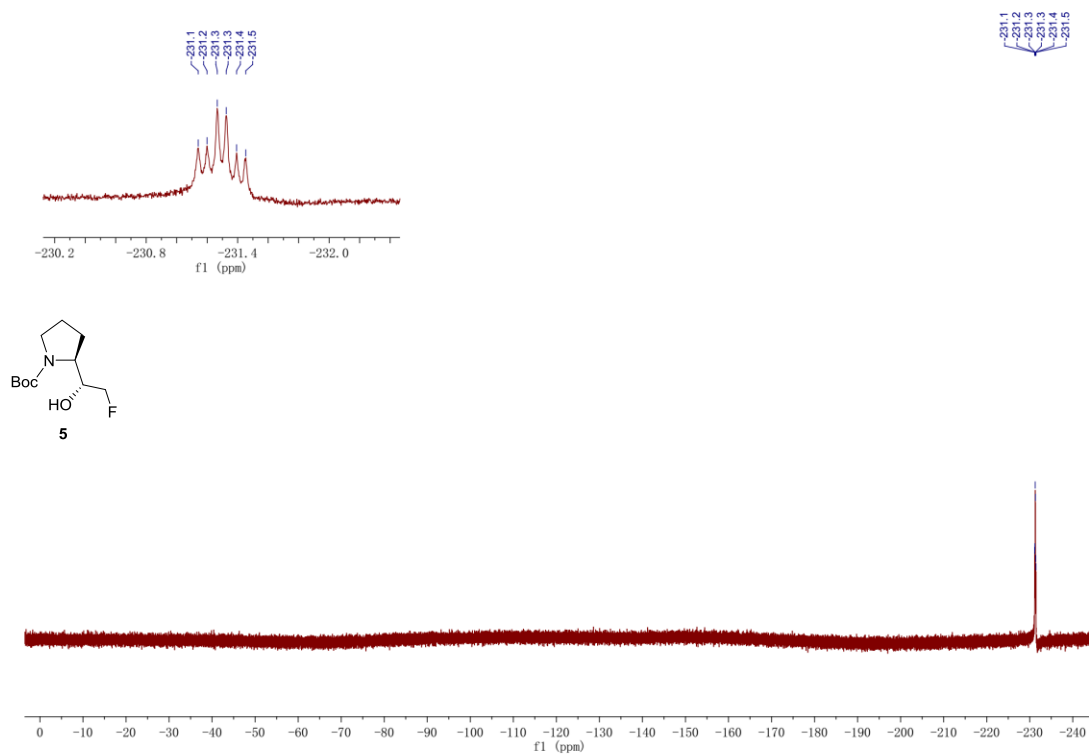

Figure S6. <sup>19</sup>F NMR (400 MHz, CDCl<sub>3</sub>) spectrum of compound 5.

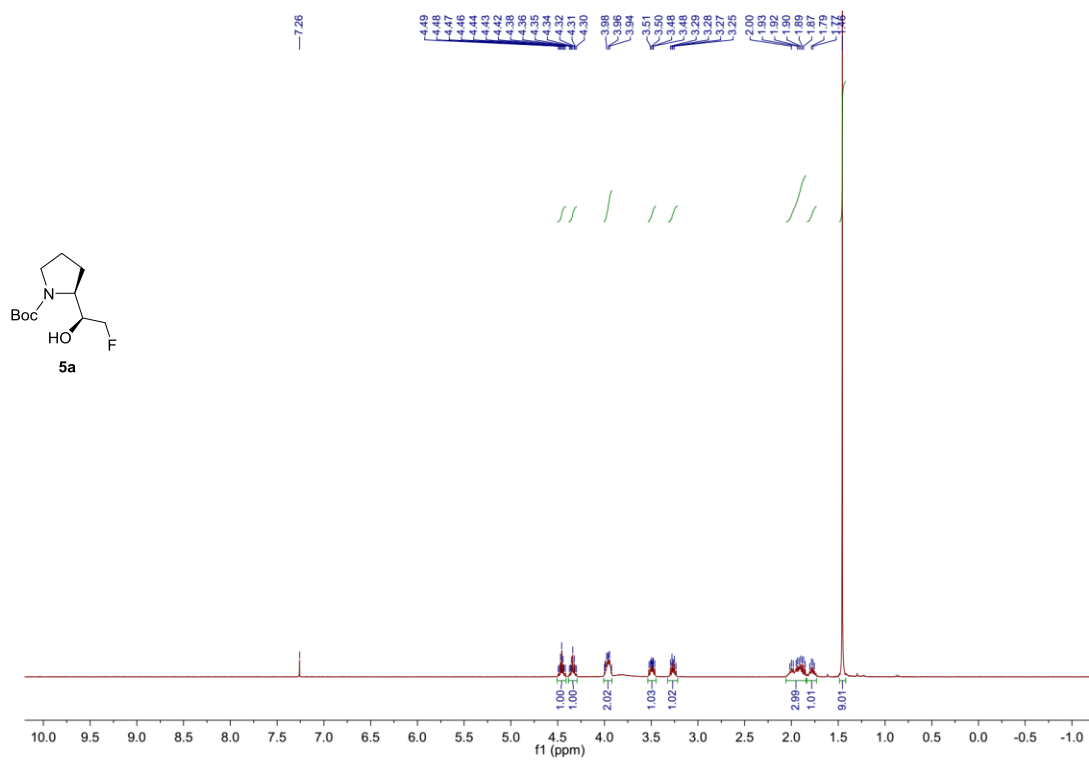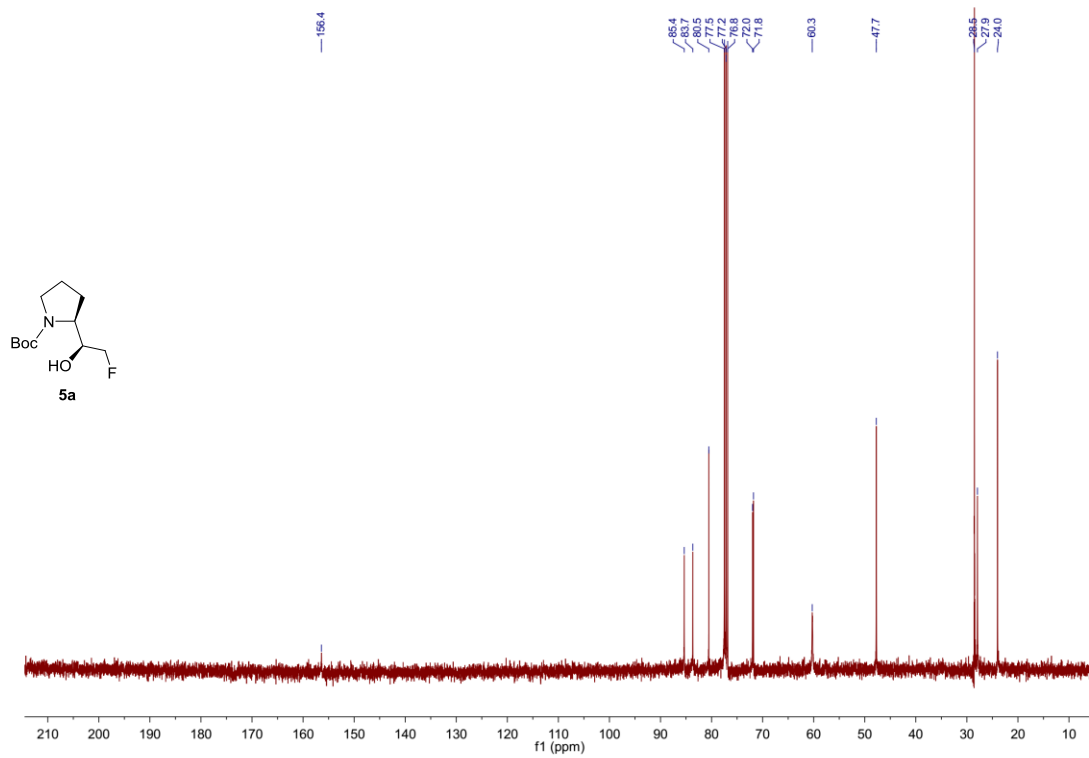

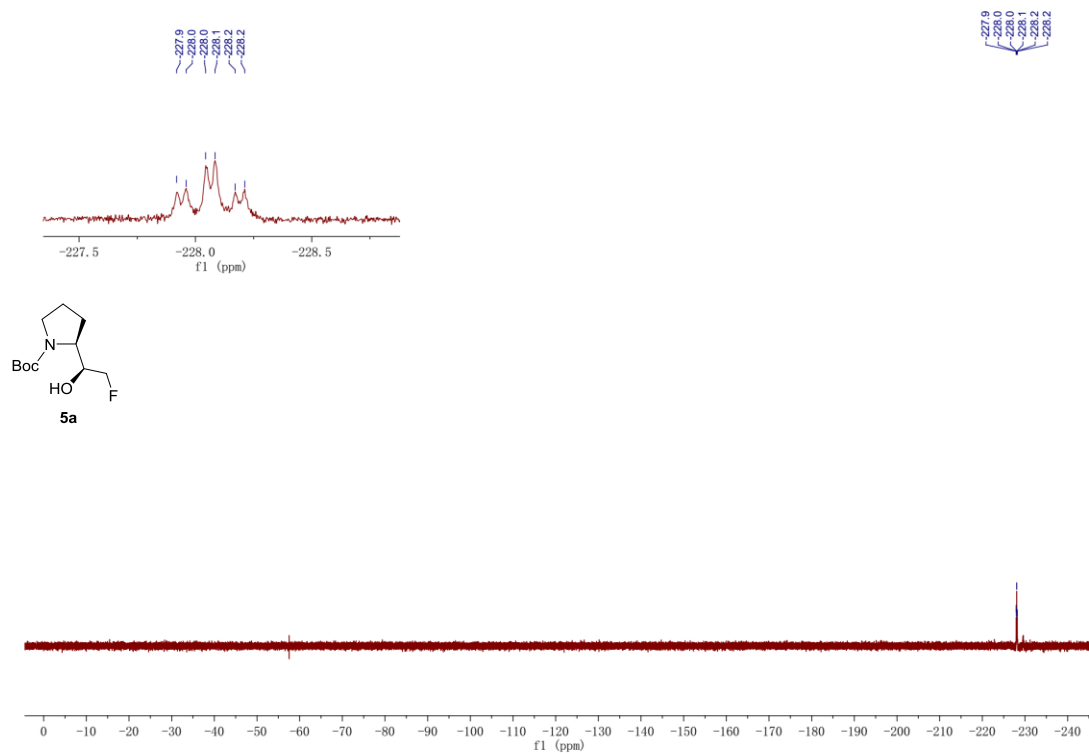

**Figure S9.**  $^{19}\text{F}$  NMR (400 MHz,  $\text{CDCl}_3$ ) spectrum of compound **5a**.

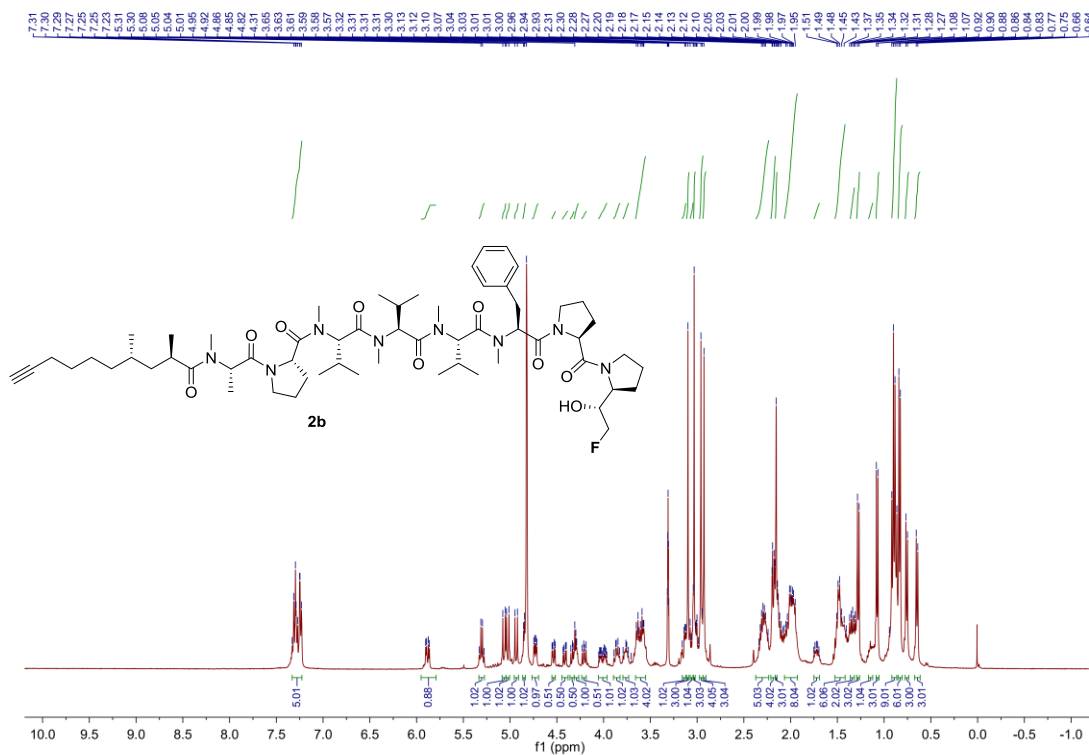

**Figure S10.**  $^1\text{H}$  NMR (400 MHz,  $\text{CD}_3\text{OD}$ ) spectrum of compound **2b**.

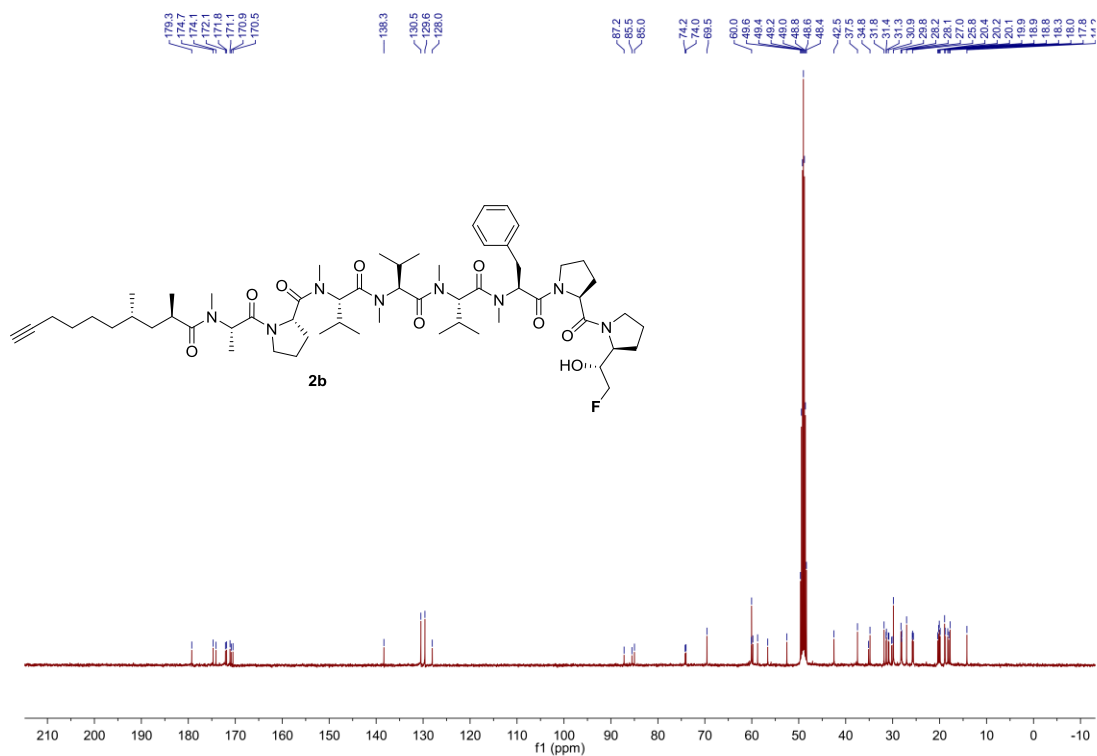

**Figure S11.**  $^{13}\text{C}$  NMR (100 MHz,  $\text{CD}_3\text{OD}$ ) spectrum of compound **2b**.

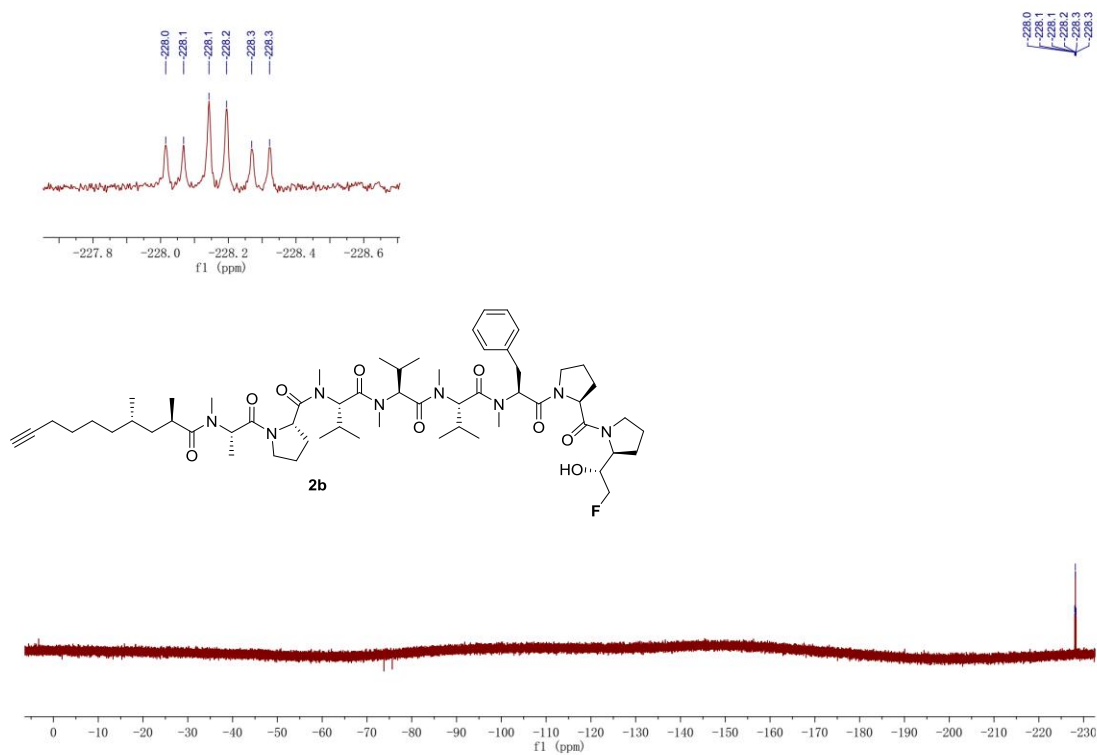

**Figure S12.**  $^{19}\text{F}$  NMR (400 MHz,  $\text{CD}_3\text{OD}$ ) spectrum of compound **2b**.

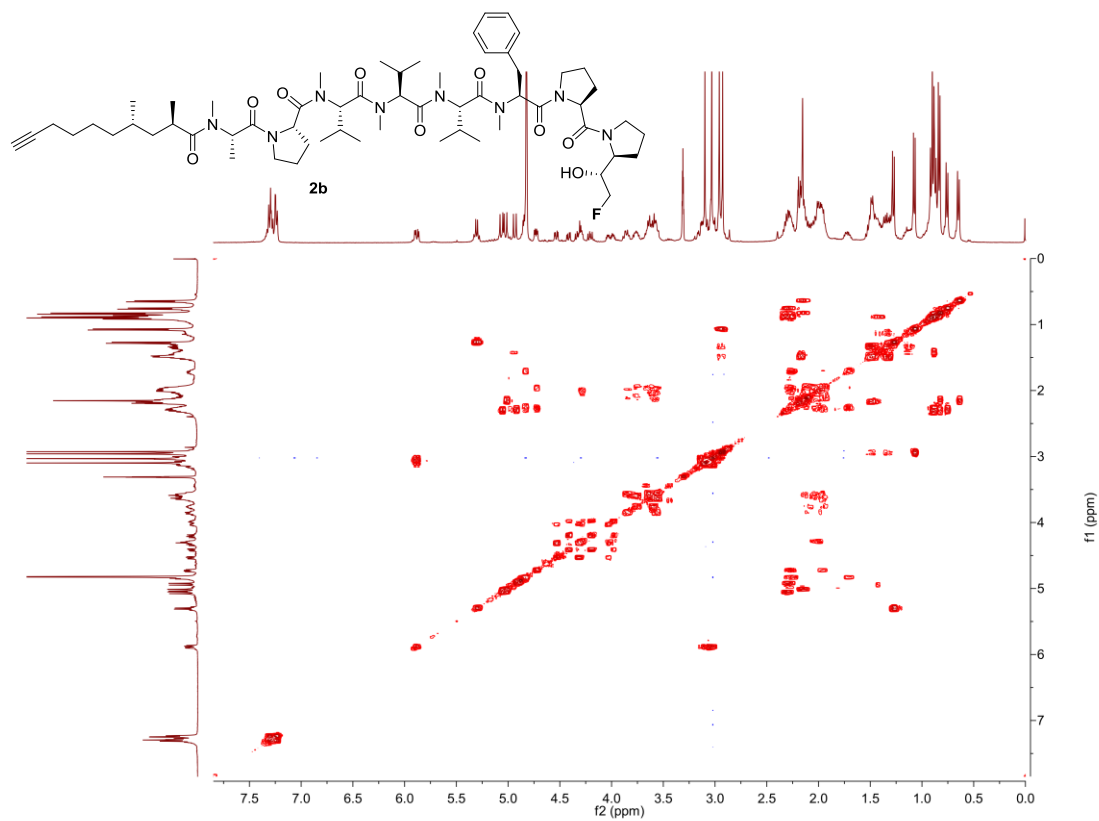

Figure S13. COSY ( $^1\text{H}$ , 400 MHz,  $\text{CD}_3\text{OD}$ ) spectrum of compound **2b**.

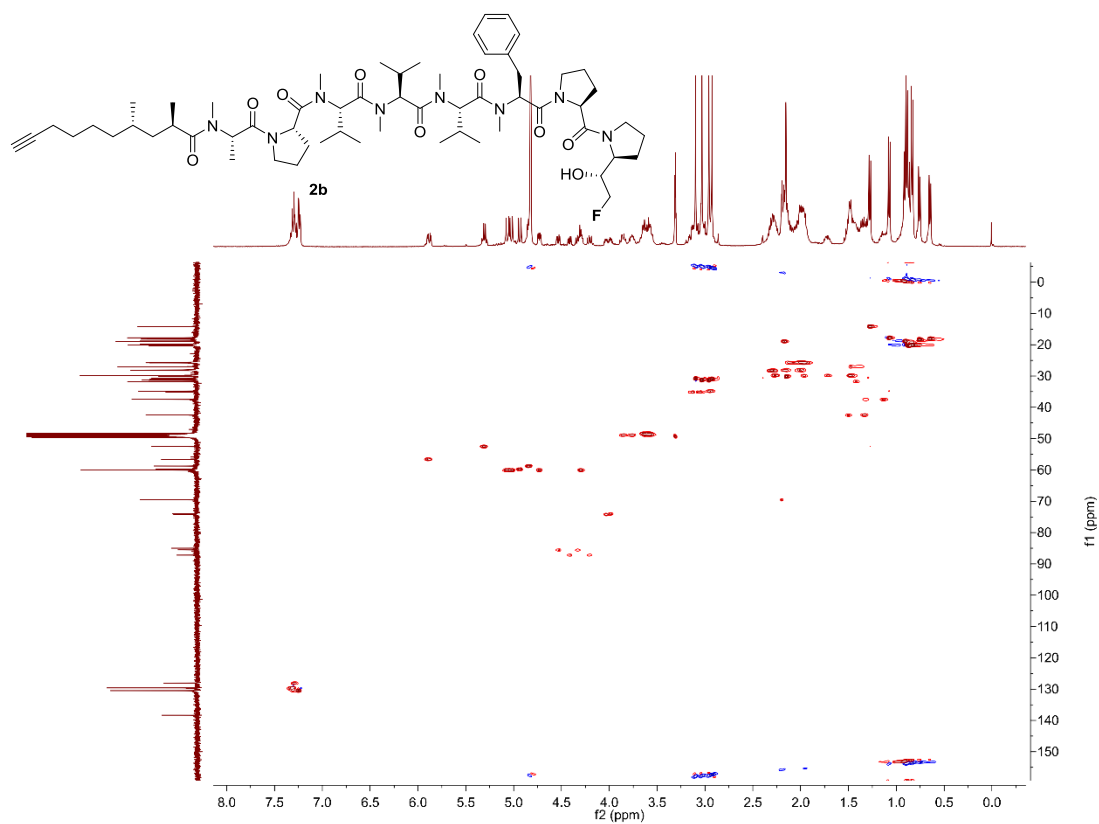

Figure S14. HSQC ( $^1\text{H}$ , 400 MHz,  $^{13}\text{C}$ , 100 MHz,  $\text{CD}_3\text{OD}$ ) spectrum of compound **2b**.



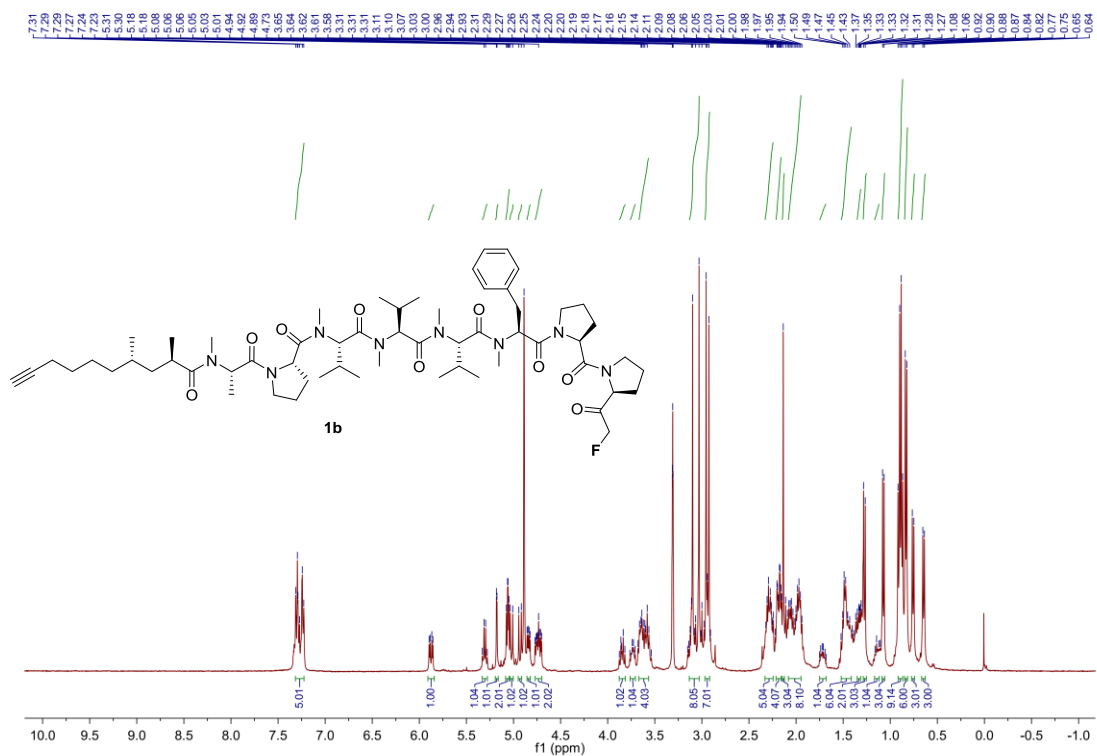

Figure S15. <sup>1</sup>H NMR (400 MHz, CD<sub>3</sub>OD) spectrum of compound **1b**

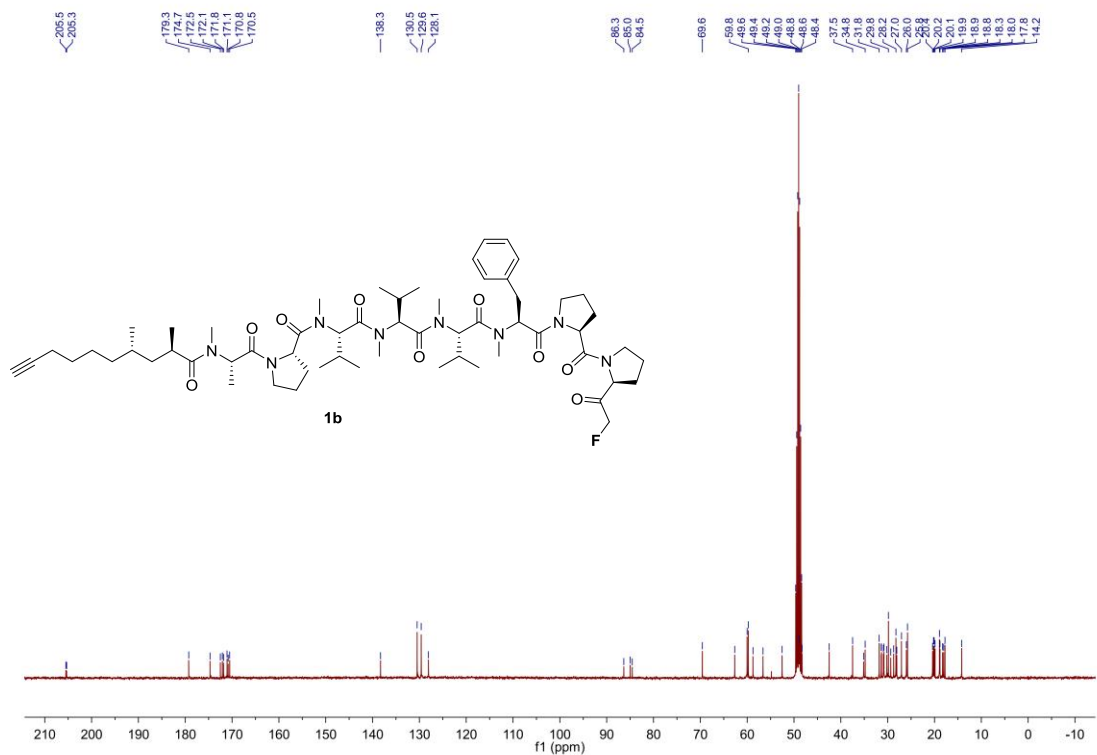

Figure S16. <sup>13</sup>C NMR (100 MHz, CD<sub>3</sub>OD) spectrum of compound **1b**.

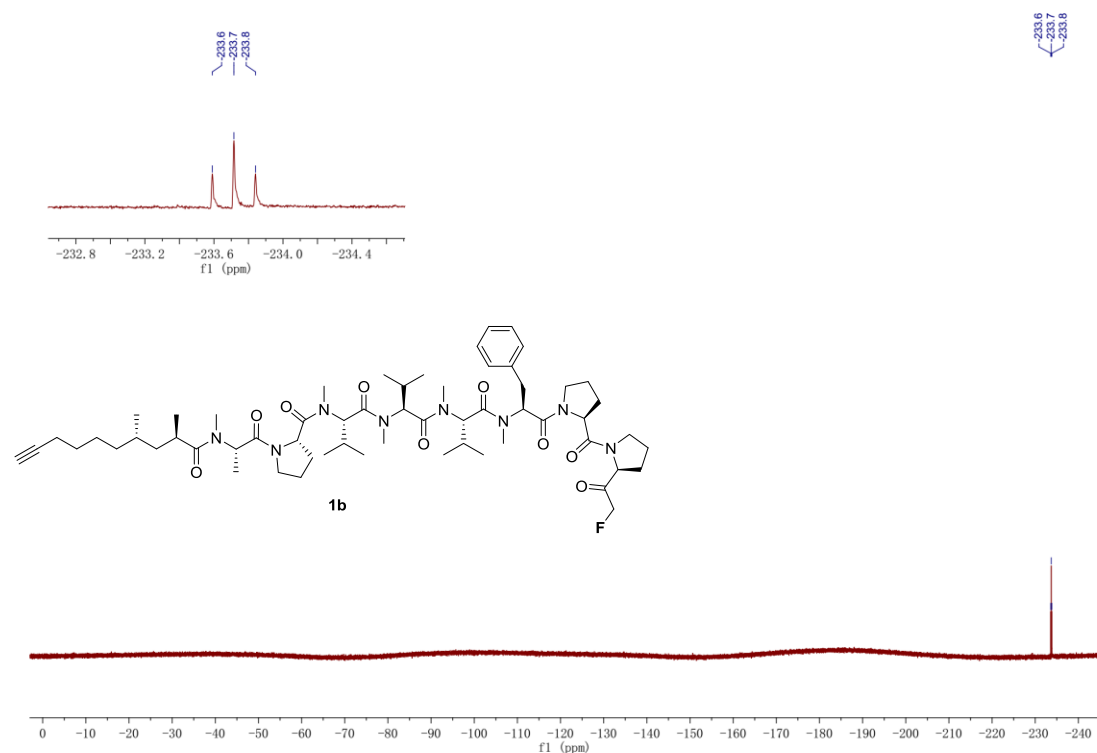

Figure S17.  $^{19}\text{F}$  NMR (400 MHz,  $\text{CD}_3\text{OD}$ ) spectrum of compound **1b**.

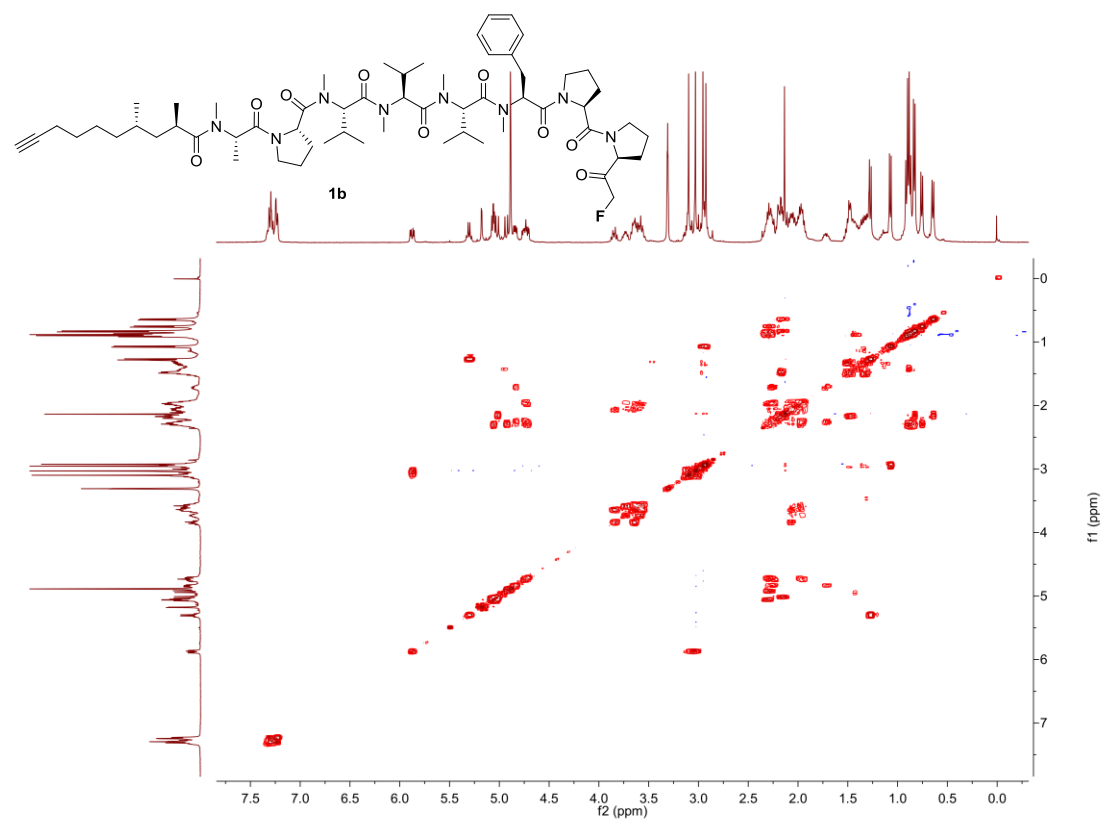

Figure S18. COSY ( $^1\text{H}$ , 400 MHz,  $\text{CD}_3\text{OD}$ ) spectrum of compound **1b**.

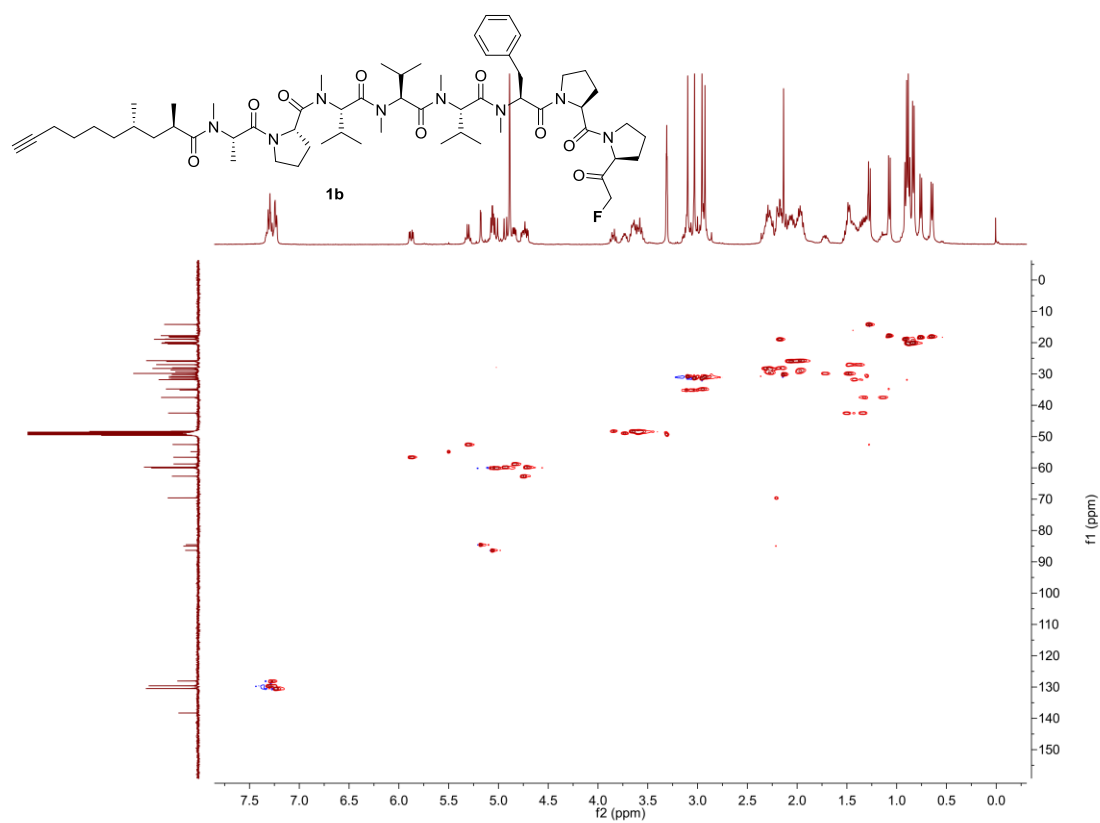

**Figure S19.** HSQC ( $^1\text{H}$ , 400 MHz,  $^{13}\text{C}$ , 100 MHz,  $\text{CD}_3\text{OD}$ ) spectrum of compound **1b**.
